# Supplementary material
Source: Frontiers journal article supplement (https://www.frontiersin.org/articles/514992)
Supplement: Data_Sheet_1.PDF [file Data_Sheet_1.PDF]

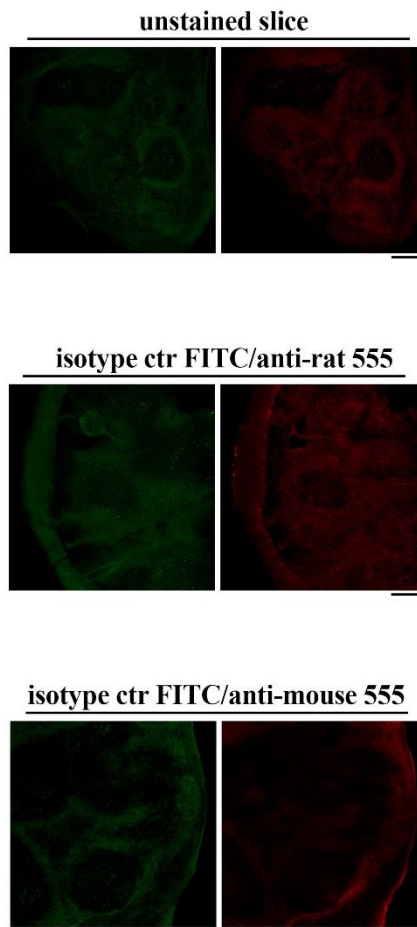

**Legend to Supplementary Figure 1.** Immunofluorescence analysis of spleen slices immediately after cutting, permeabilized and either left unstained or labeled with anti-Rat 555 (red) / isotype control FITC (green) or with anti-Mouse 555 (red) / isotype control FITC (green) antibodies. Median optical sections are shown. Size bar, 200  $\mu$ m.
